# Supplementary material
Source: PubMed Central journal article supplement (PMC4468044)

Supplementary Figure 1

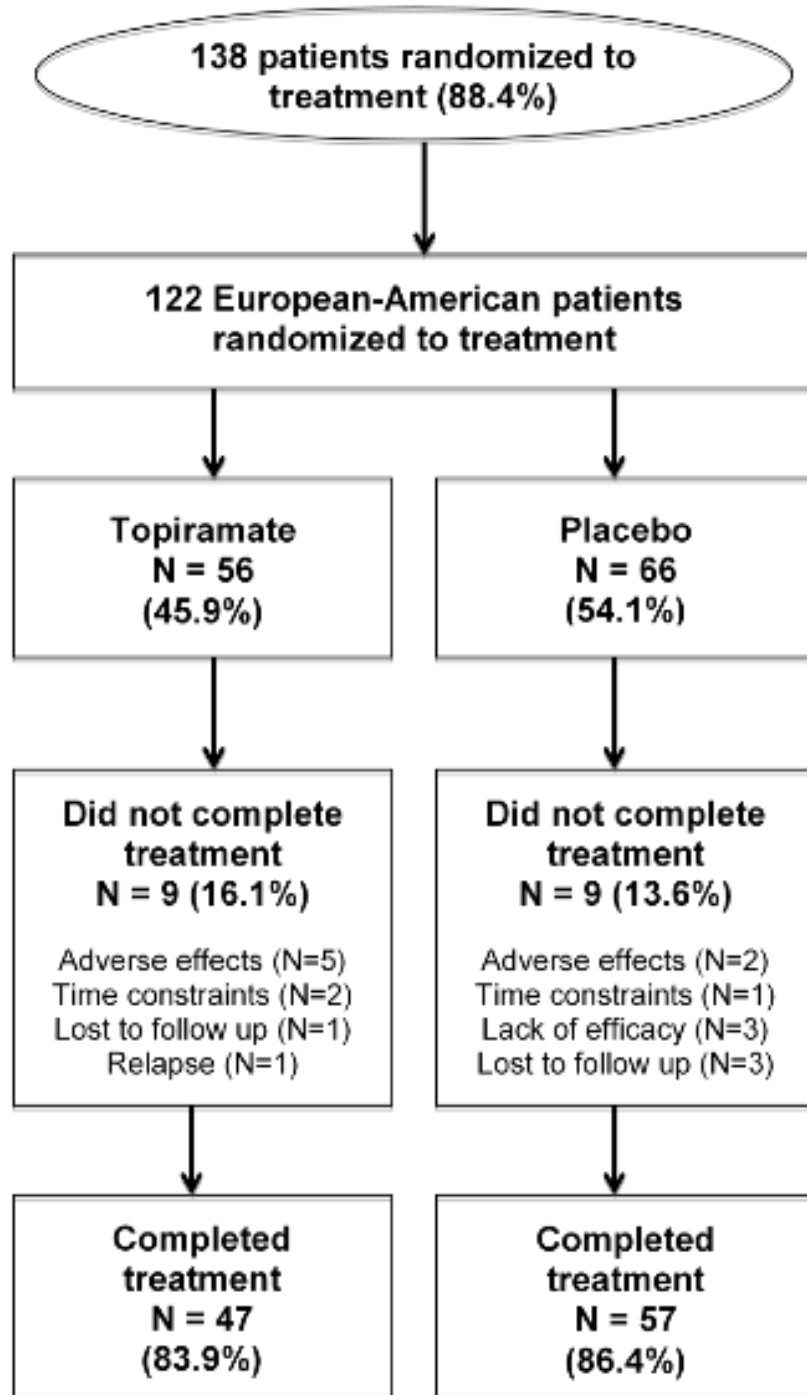

Supplement: NIHMS644196-supplement-Supp_FigureS1.pdf [file NIHMS644196-supplement-Supp_FigureS1.pdf]
